# Supplementary material
Source: MDPI journal article supplement (https://www.mdpi.com/2073-4433/14/10/1591)
Supplement: s1 [file s1]

## Article

# Spatiotemporal Characteristics of Ozone Pollution and Resultant Increased Human Health Risks in Central China

Yuren Tian <sup>1</sup>, Yun Wang <sup>2</sup>, Yan Han <sup>3</sup>, Hanxiong Che <sup>3</sup>, Xin Qi <sup>3</sup>, Yuanqian Xu <sup>4</sup>, Yang Chen <sup>3</sup>, Xin Long <sup>3,\*</sup> and Chong Wei <sup>5,\*</sup>

<sup>1</sup> Zhongjin Environmental Technology Co., Ltd., Taiyuan 030000, China; tianjiang527@126.com

<sup>2</sup> Key Laboratory for Digital Land and Resources of Jiangxi Province, East China University of Technology, Nanchang 330013, China; wy@ecut.edu.cn

<sup>3</sup> Research Center for Atmospheric Environment, Chongqing Institute of Green and Intelligent Technology, Chinese Academy of Sciences, Chongqing 400714, China; hanyan@cigit.ac.cn (Y.H.); chehanxiong\_2021@outlook.com (H.C.); qixin@cigit.ac.cn (X.Q.); chenyang@cigit.ac.cn (Y.C.)

<sup>4</sup> College of Materials and Chemical Engineering, Zhengzhou University of Light Industry, Zhengzhou 450001, China; yuanqianxu@zzuli.edu.cn

<sup>5</sup> Shanghai Carbon Data Research Center, CAS Key Laboratory of Low-Carbon Conversion Science and Engineering, Shanghai Advanced Research Institute, Chinese Academy of Sciences, Shanghai 201210, China

\* Correspondence: longxin@cigit.ac.cn (X.L.); weic@sari.ac.cn (C.W.); Tel.: +86-180-2698-2539 (X.L.); +86-173-1721-9129 (C.W.)

**Table S1.** The study area, ozone and population dataset used in this study.

| Description                    | Descriptions                                                                                                                                                                                                  |
|--------------------------------|---------------------------------------------------------------------------------------------------------------------------------------------------------------------------------------------------------------|
| Study area                     | Central China<br>Henan, Hubei, Hunan Provinces                                                                                                                                                                |
| Dataset                        |                                                                                                                                                                                                               |
| Ozone pollution<br>ChinaHighO3 | Time coverage: 2014 to 2020<br>Spatial Coverage: Central China<br>Spatial resolution: 10 km × 10 km<br>Data source: <a href="http://tapdata.org.cn">http://tapdata.org.cn</a> (accessed on 21 May 2023)       |
| Population                     | Time coverage: 2014 to 2020<br>Spatial Coverage: Central China<br>Spatial resolution: 1 km × 1 km<br>Data source: <a href="https://www.worldpop.org/">https://www.worldpop.org/</a> (accessed on 21 May 2023) |

**Table S2.** Average annual MDA8 O<sub>3</sub> concentration [ $\mu\text{g m}^{-3}$ ] of entire Central China from 2014 to 2020.

| Year | 2014     | 2015     | 2016     | 2017     | 2018      | 2019       | 2020      |
|------|----------|----------|----------|----------|-----------|------------|-----------|
|      | 80.1±7.5 | 80.4±7.9 | 87.6±8.8 | 93.3±9.7 | 96.2±11.2 | 101.2±12.1 | 96.3±12.3 |

Note: The value behind “±” is the standard deviation.

**Table S3.** The R-squared values between the annual premature mortality and the annual population and ozone levels, as assessed across all grid points in Central China from 2014 to 2020.

| Year<br>Variables | 2014 | 2015 | 2016 | 2017 | 2018 | 2019 | 2020 |
|-------------------|------|------|------|------|------|------|------|
| Population        | 0.86 | 0.87 | 0.91 | 0.83 | 0.92 | 0.95 | 0.92 |
| Ozone levels      | 0.26 | 0.25 | 0.25 | 0.25 | 0.23 | 0.22 | 0.22 |



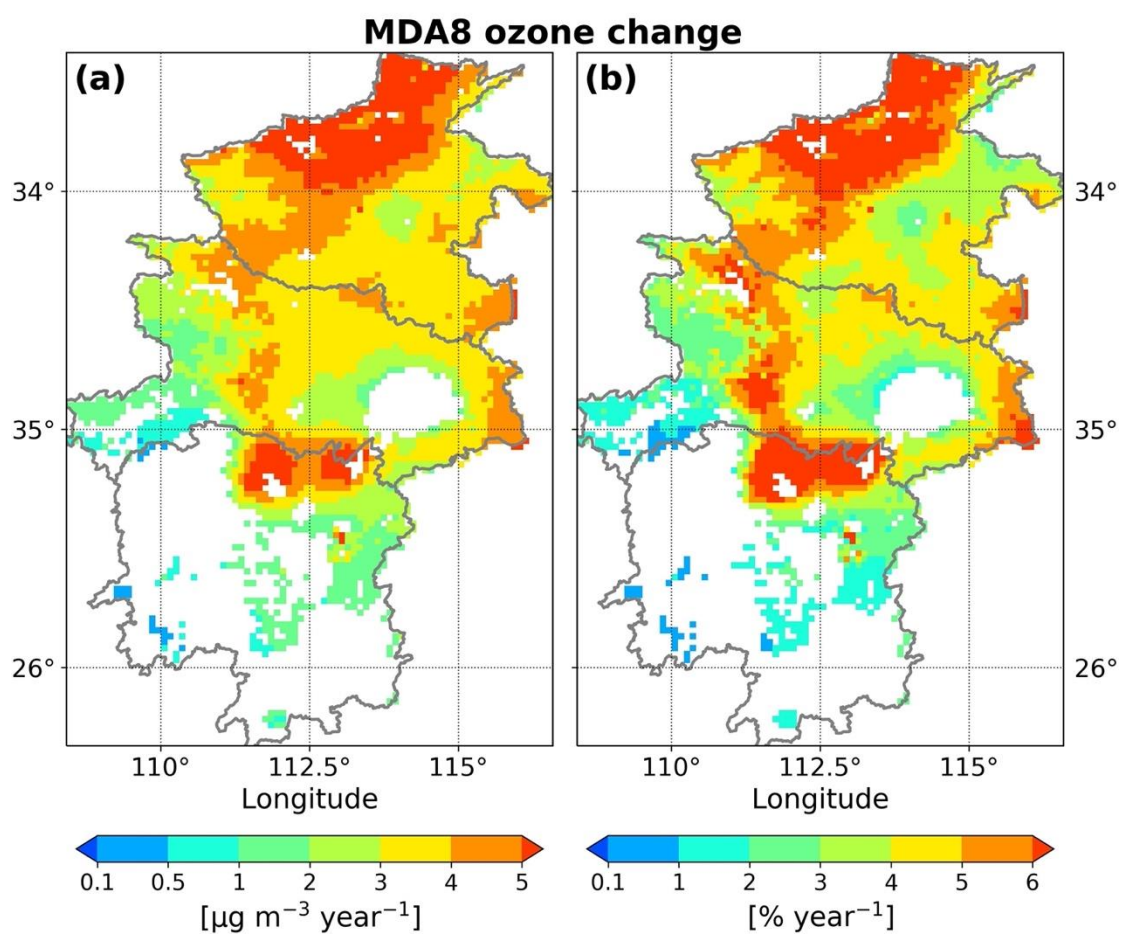

**Figure S1.** The spatial patterns of annual changes in MDA8 ozone concentration from 2014 to 2020, including formats of (a) mass concentration and (b) percentage.

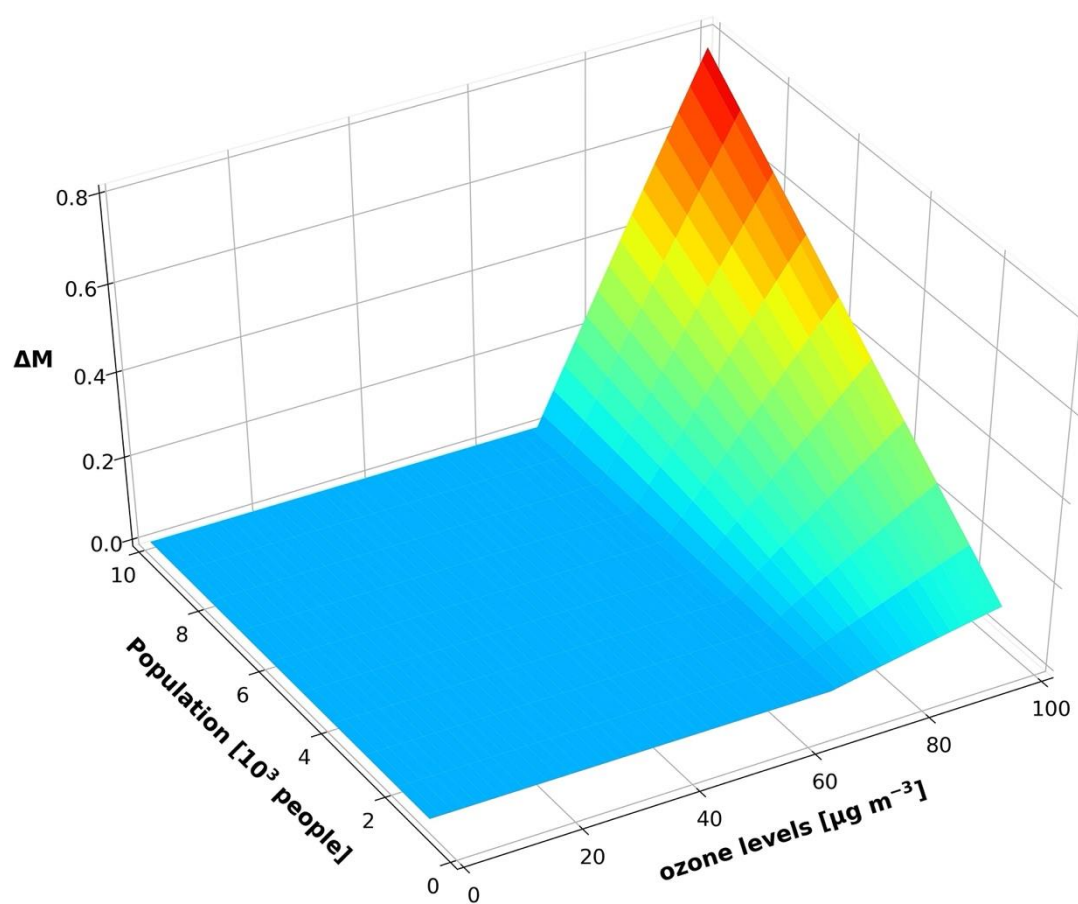

**Figure S2.** The correlations between premature mortality and ozone levels as well as exposed population.

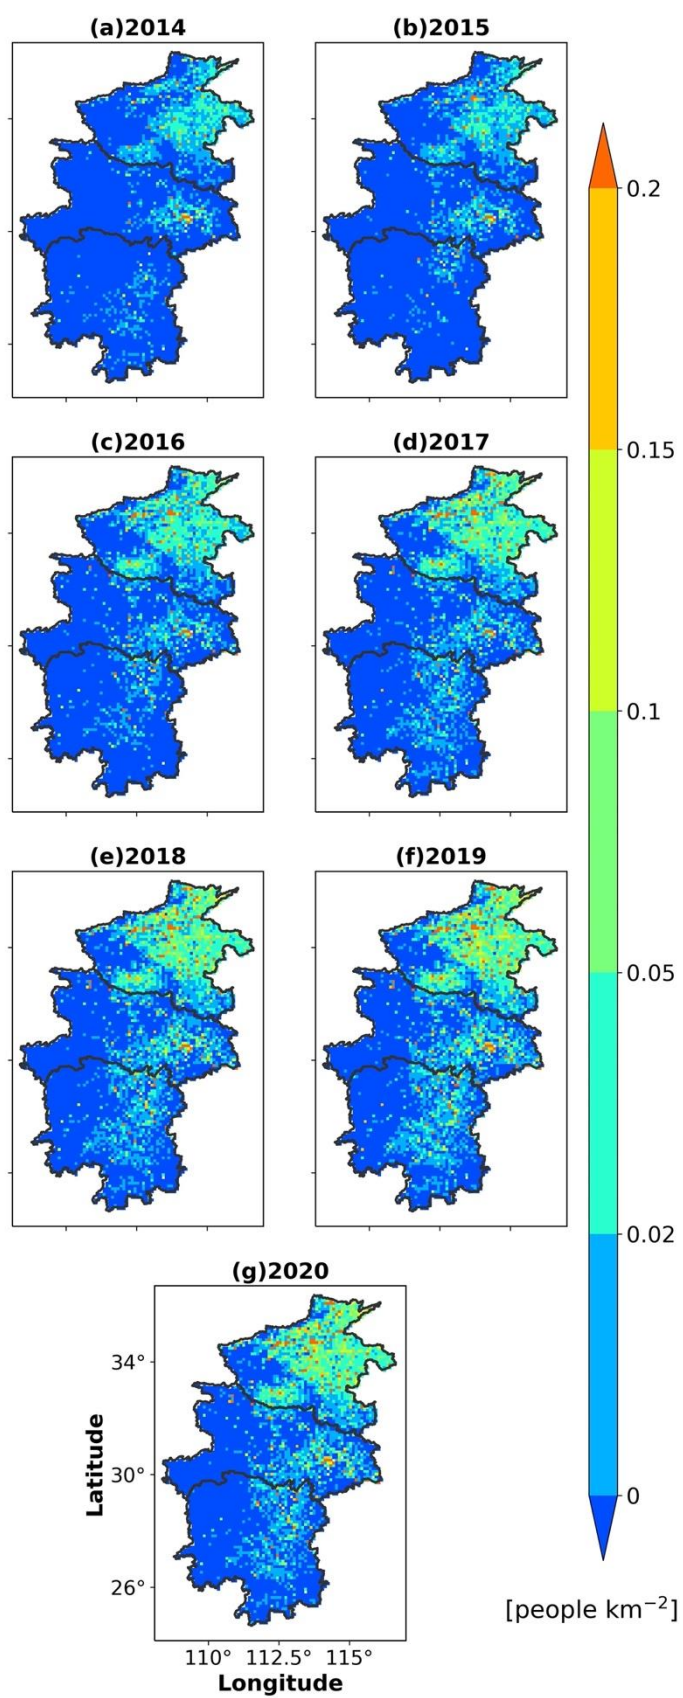

**Figure S3.** The spatial patterns of annual premature mortality attributed to ozone exposure for respiratory diseases from 2014 to 2020.

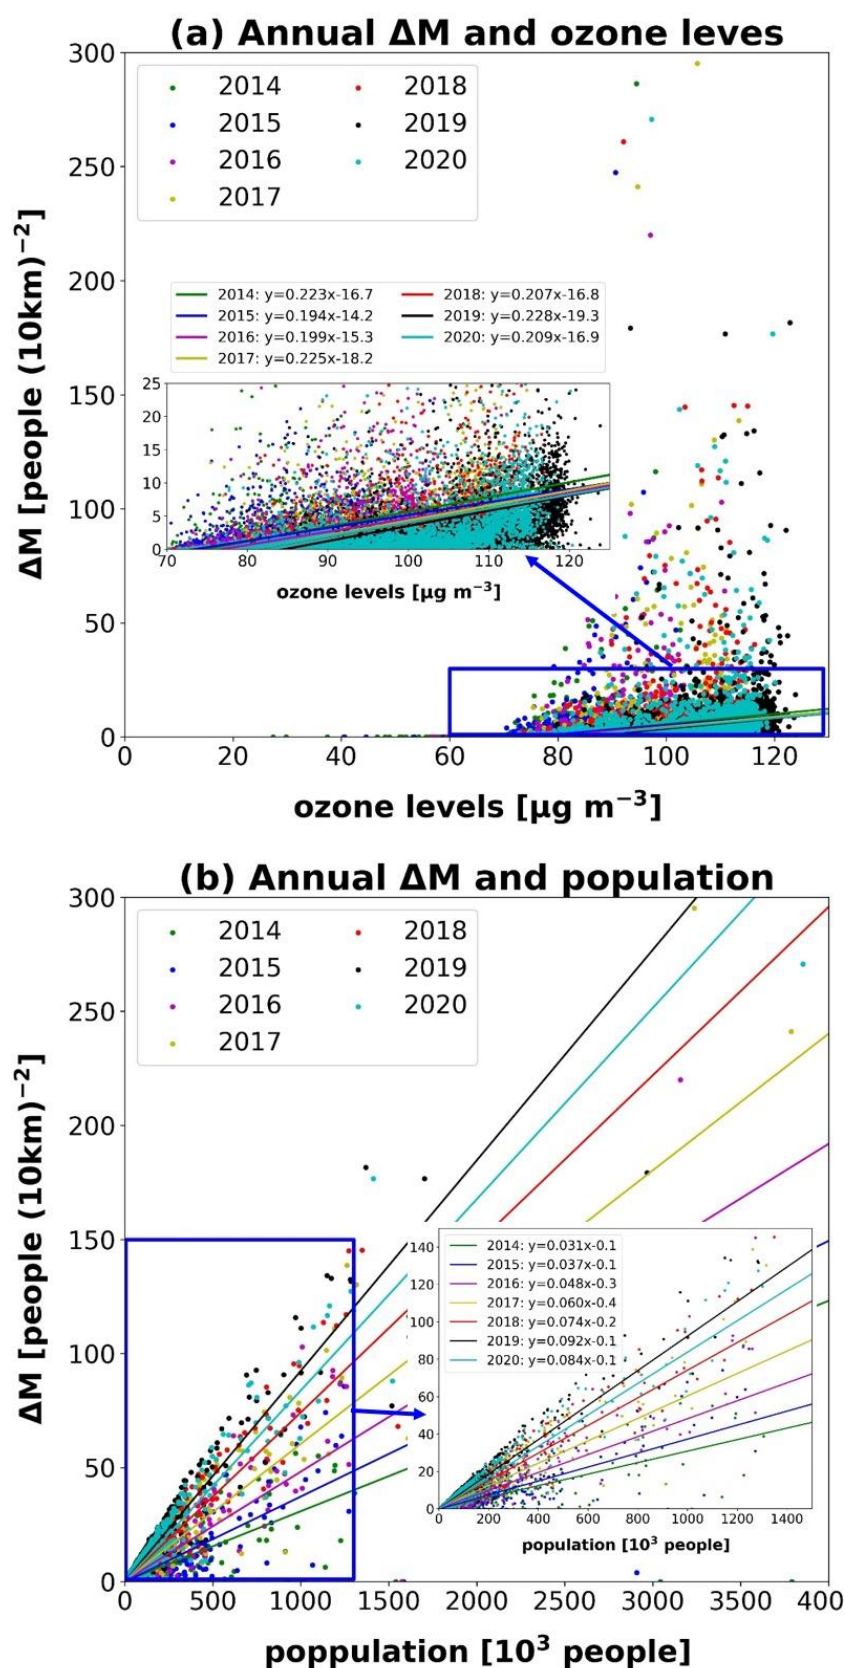

**Figure S4.** The overall regional correlation between the annual premature mortality and (a) ozone levels and (b) the annual population, as assessed across all grid points in Central China from 2014 to 2020.

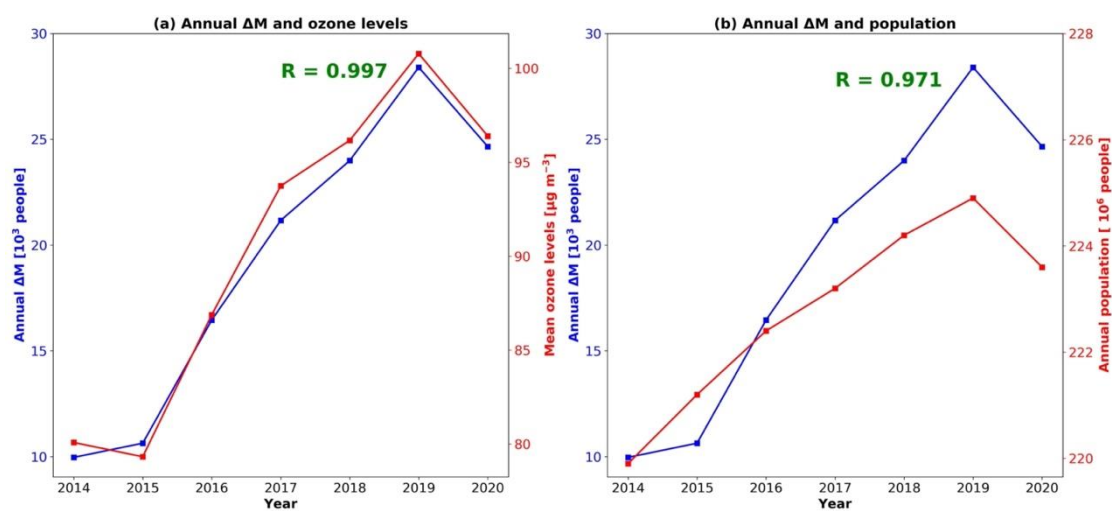

**Figure S5.** Annual variations of premature mortality, regional average ozone levels, and total population in Central China from 2014 to 2020.
